# Supplementary material for: Heterologous HSPC Transplantation Rescues Neuroinflammation and Ameliorates Peripheral Manifestations in the Mouse Model of Lysosomal Transmembrane Enzyme Deficiency, MPS IIIC
Source: Cells. 2024 May 20;13(10):877. doi: 10.3390/cells13100877 (PMC11120110; doi:10.3390/cells13100877)
Supplement: Supplementary file 1 [file cells-13-00877-s001.zip › cells-2969762-supplementary.pdf]

## Supplementary materials

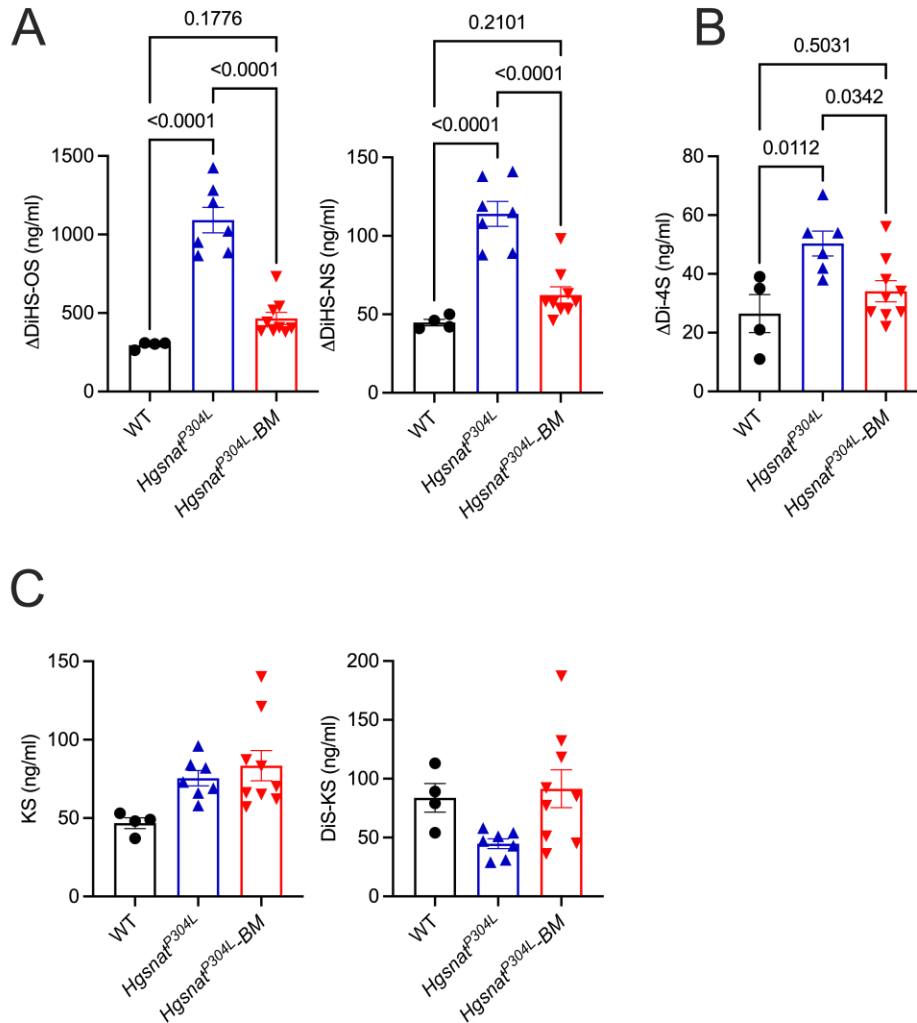

**Figure S1. Levels of disaccharides produced by enzymatic digestion of HS, KS and DS in dry blood spots of mice 6 weeks after HSPC transplantation.**

Levels of HS-derived O-sulfated ( $\Delta$ DiHS-OS) and N-sulfated ( $\Delta$ DiHS-NS) disaccharides (**A**) or dermatan sulfate-derived disaccharide ( $\Delta$ Di-4S) (**B**) are increased in the DBS of untreated *Hgsnat*<sup>P304L</sup> mice, while in the transplanted *Hgsnat*<sup>P304L</sup> mice of the same age, the levels of all three disaccharides are not significantly different from the normal levels. (**C**) Levels of disaccharides produced by enzymatic digestion of mono (KS) and di-sulfated (DiS-KS) keratan sulfate are similar in DBS of WT, *Hgsnat*<sup>P304L</sup> and transplanted *Hgsnat*<sup>P304L</sup> mice. All graphs show individual data, means and SD of experiments performed with samples of 4-9 male and female mice per genotype per treatment. P values were calculated by one-way ANOVA with Tukey post hoc test.

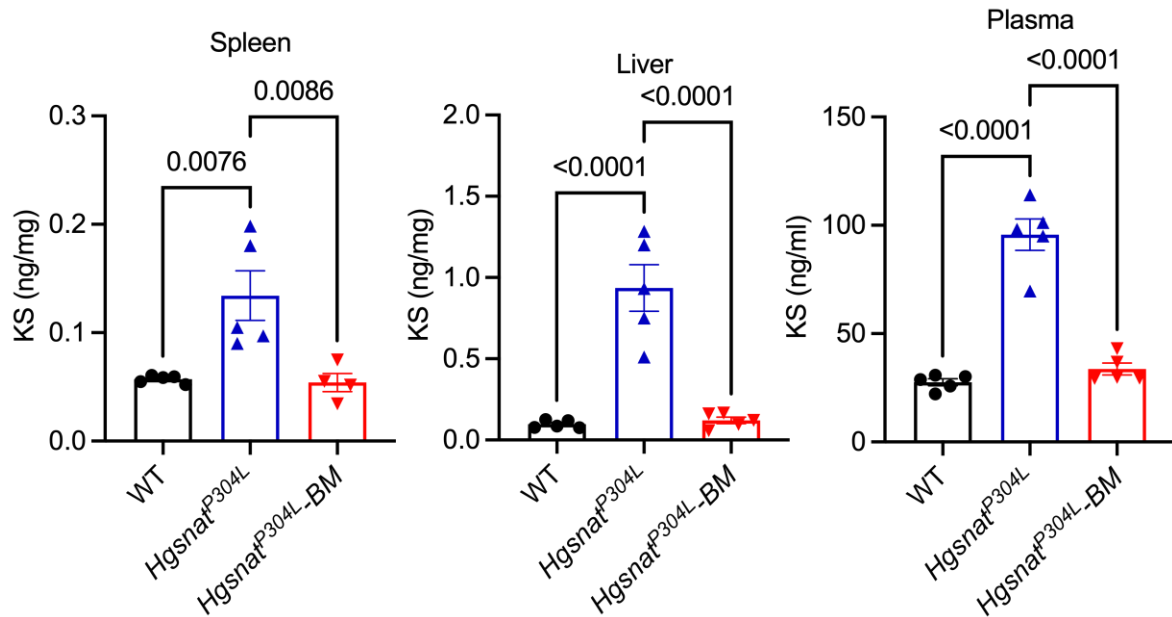

**Figure S2. Levels of disaccharides produced by enzymatic digestion of mono-sulfated KS in blood plasma, liver and spleen of WT, *Hgsnat*<sup>P304L</sup> and transplanted *Hgsnat*<sup>P304L</sup> mice at the age of 8 months.**

All graphs show individual data, means and SD of experiments performed using tissues from 5 male and female mice per genotype per treatment. P values were calculated by one-way ANOVA with Tukey post hoc test.

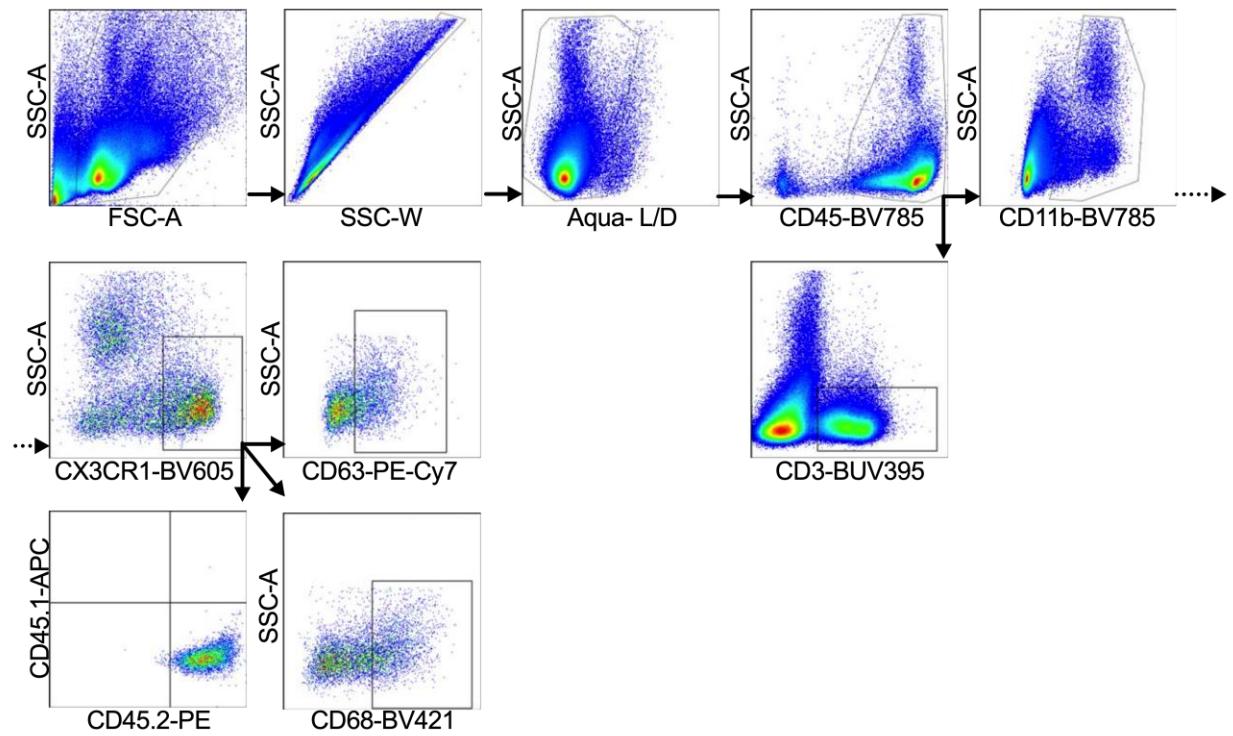

**Figure S3. Gating strategy for the analysis of dissociated brain/spinal cord cells and splenocytes by flow cytometry.**

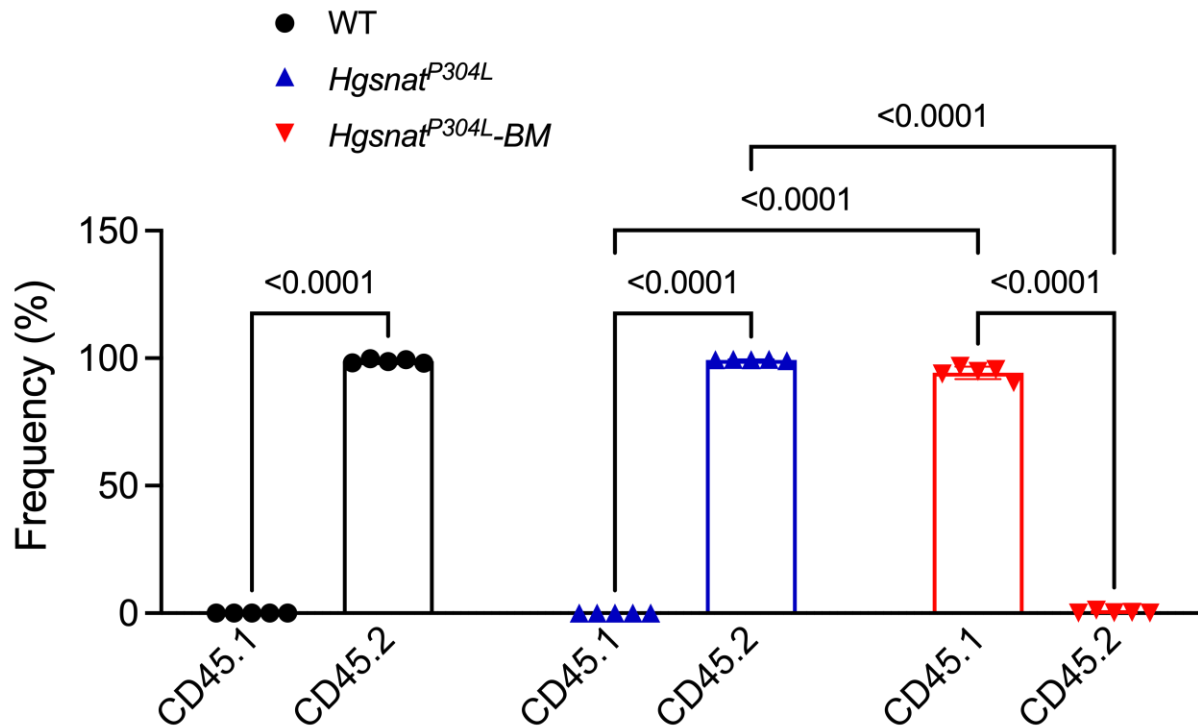

**Figure S4. All CD45/CD11b/CX3CR1-positive macrophages in the spleen of transplanted *Hgsnat*<sup>P304L</sup> mice show CD45.1 phenotype indicating that they are derived from transplanted HSPC.**

Graphs show individual results, means and SD from experiments conducted with 5 mice per group. P values were calculated using one-way ANOVA test with Tukey post hoc test.

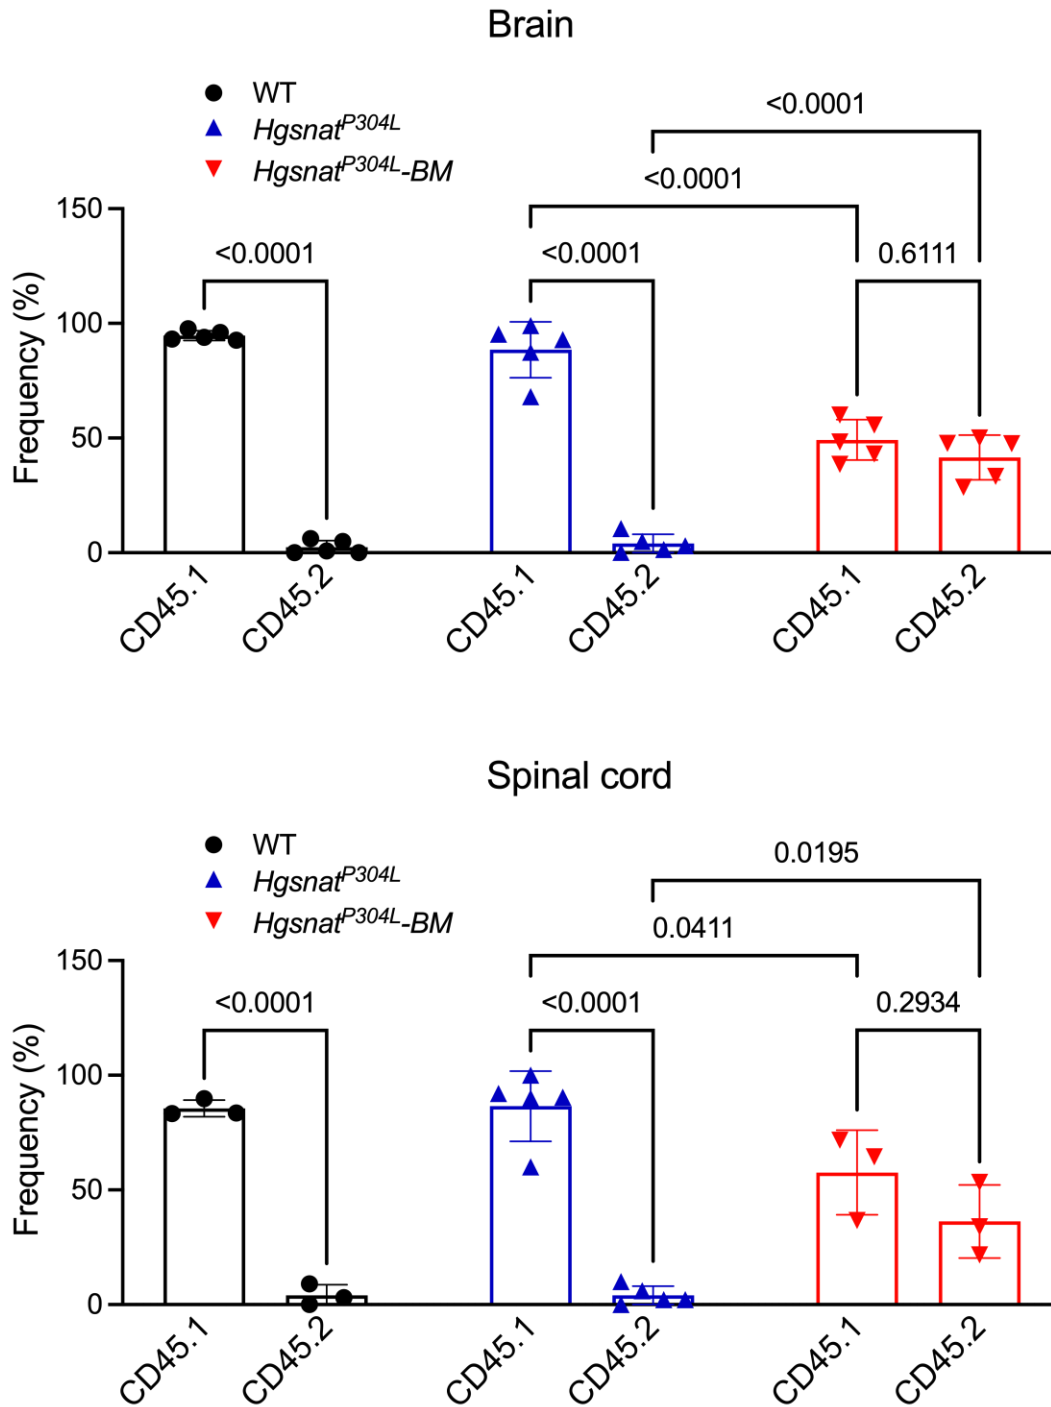

**Figure S5. In both brain and spinal cord tissues approximately 50% of CD45/CD11b/CX3CR1-positive macrophages/microglia cells are CD45.1-positive and derived from transplanted HSPC.**

Graphs show individual results, means and SD from experiments conducted with 3-5 mice per group. P values were calculated using one-way ANOVA test with Tukey post hoc test.

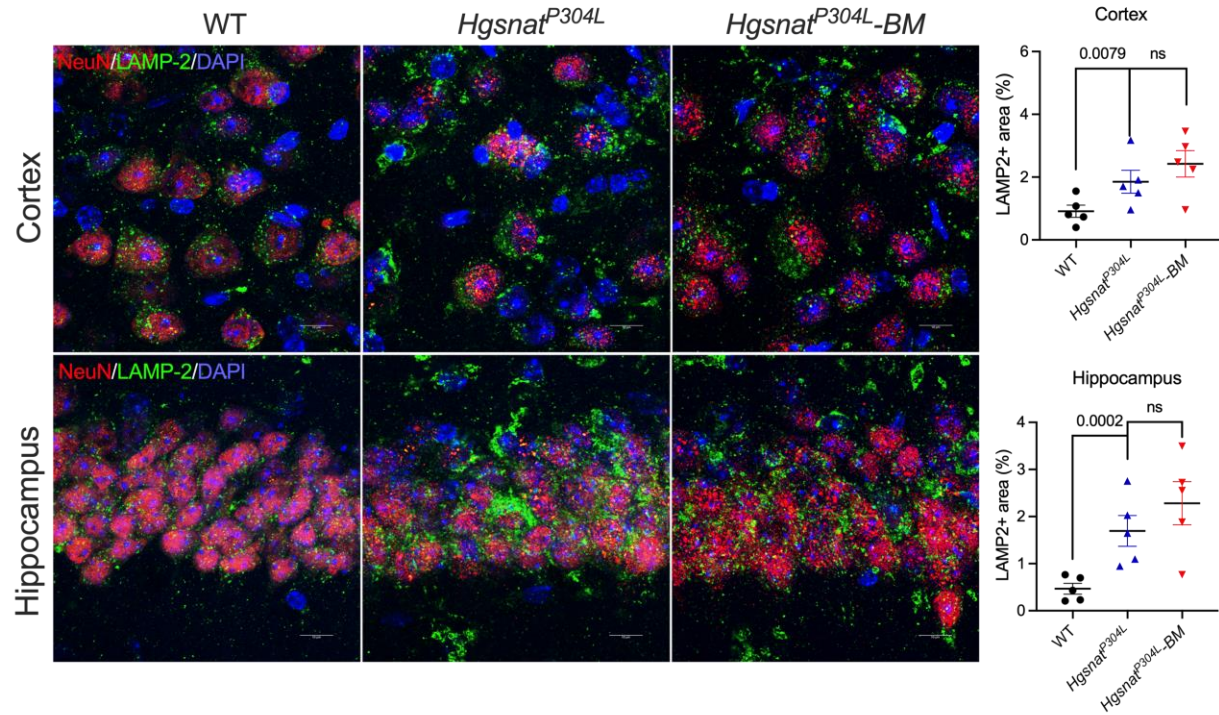

**Fig. S6. Levels of LAMP-2-positive puncta are unchanged in cortical and hippocampal neurons of transplanted *Hgsnat*<sup>P304L</sup> mice.**

Panels show representative images of brain cortex (layers 4-5) and CA1 region of hippocampus of 8-month-old WT and treated or untreated *Hgsnat*<sup>P304L</sup> mice labeled for LAMP-2 (green) and NeuN (red). DAPI was used as a nuclear counterstain. Scale bars equal 10  $\mu$ m. Graphs show quantification of LAMP-2-positive areas in NeuN-positive cells with ImageJ software. All graphs show individual results, means and SD from experiments conducted with 5 mice (three panels per mouse) per genotype per treatment. P values were calculated using Nested one-way ANOVA test with Tukey post hoc test.

**Supplementary Table 1. Mouse engraftment 6 weeks after transplantation**

| <b>Body Weight<br/>before<br/>transplantation<br/>(g)</b> | <b>ID # /sex</b> | <b>CD45.1+<br/>myeloid cells<br/>(%)</b> | <b>CD45.2+<br/>myeloid cells<br/>(%)</b> |
|-----------------------------------------------------------|------------------|------------------------------------------|------------------------------------------|
| 26                                                        | 11354 / F        | 83.7                                     | 15.1                                     |
| 30                                                        | 11335 / M        | 84.5                                     | 14.2                                     |
| 30                                                        | 11334 / M        | 88.2                                     | 10.6                                     |
| 33                                                        | 11333 / M        | 82.0                                     | 16.8                                     |
| 23                                                        | 11560 / F        | 88.0                                     | 9.9                                      |
| 24                                                        | 11561 / F        | 87.6                                     | 12.3                                     |
| 24                                                        | 11562 / F        | 86.8                                     | 12.3                                     |
| 30                                                        | 11552 / M*       | NA                                       | NA                                       |
| 29                                                        | 11553 / M        | 88.3                                     | 10.6                                     |
| 30                                                        | 11554 / M        | 91.6                                     | 7.6                                      |
| 34                                                        | 11556 / M**      | NA                                       | NA                                       |
| 29                                                        | 11557 / M        | 94.1                                     | 4.9                                      |
| 24                                                        | 11566 / F        | 90.8                                     | 7.9                                      |
| 26                                                        | 11565 / F        | 91.4                                     | 7.0                                      |
| 25                                                        | 11564 / F        | 93.2                                     | 6.4                                      |
| 24                                                        | 11563 / F        | 91.3                                     | 8.0                                      |

\* Died on the 4<sup>th</sup> week after transplantation

\*\* Died on the 3<sup>d</sup> week after transplantation
